# Supplementary material for: Integrated Patterns of Subjective Job Insecurity: A Multigroup Person-Centered Study
Source: MDPI journal article supplement (doi:10.3390/ijerph192013306), 2022-10-15
Supplement: s1 [file s1]

## **Supplemental Materials**

### **Integrated Patterns of Subjective Job Insecurity:**

#### **A Multigroup Person-Centered Study**

Valerio Ghezzi<sup>1</sup>, Valeria Ciampa<sup>1</sup>, Tahira M. Probst<sup>2</sup>, Laura Petitta<sup>1</sup>,

Ivan Marzocchi<sup>1</sup>, Ilaria Olivo<sup>1</sup>, Claudio Barbaranelli<sup>1</sup>

<sup>1</sup> Department of Psychology, Sapienza – University of Rome (Italy)

<sup>2</sup> Washington State University, Vancouver, WA (U.S.)

**Table S1**

Standardized Factor Loadings and Reliabilities of the ESEM Factors Estimated from the Most Restrictive Measurement Invariance Model.

|                                                     | <b>ESEM Factor 1<br/>Cognitive JI</b> |             | <b>ESEM Factor 2<br/>Affective JI</b> |             | <b>ESEM Factor 3<br/>Quantitative JI</b> |             | <b>ESEM Factor 4<br/>Qualitative JI</b> |             |
|-----------------------------------------------------|---------------------------------------|-------------|---------------------------------------|-------------|------------------------------------------|-------------|-----------------------------------------|-------------|
|                                                     | <b>ITA</b>                            | <b>U.S.</b> | <b>ITA</b>                            | <b>U.S.</b> | <b>ITA</b>                               | <b>U.S.</b> | <b>ITA</b>                              | <b>U.S.</b> |
| <b>JSI parcel 1</b>                                 | <b>.831</b>                           | <b>.830</b> | .086                                  | .092        | -.004                                    | -.005       | -.036                                   | -.040       |
| <b>JSI parcel 2</b>                                 | <b>.891</b>                           | <b>.887</b> | -.029                                 | -.031       | .068                                     | .077        | .016                                    | .017        |
| <b>JSI parcel 3</b>                                 | <b>.849</b>                           | <b>.898</b> | .028                                  | .031        | -.002                                    | -.003       | .028                                    | .032        |
| <b>JSS parcel 1</b>                                 | .133                                  | .126        | <b>.764</b>                           | <b>.774</b> | -.016                                    | -.018       | .054                                    | .057        |
| <b>JSS parcel 2</b>                                 | -.046                                 | -.049       | <b>.802</b>                           | <b>.902</b> | .064                                     | .076        | -.041                                   | -.048       |
| <b>JSS parcel 3</b>                                 | .045                                  | .043        | <b>.826</b>                           | <b>.838</b> | .001                                     | .001        | .028                                    | .029        |
| <b>Quantitative JI 1</b>                            | .060                                  | .062        | -.037                                 | -.041       | <b>.759</b>                              | <b>.883</b> | .027                                    | .031        |
| <b>Quantitative JI 2</b>                            | -.036                                 | -.039       | .053                                  | .060        | <b>.752</b>                              | <b>.909</b> | .006                                    | .007        |
| <b>Quantitative JI 3</b>                            | .066                                  | .060        | .030                                  | .029        | <b>.804</b>                              | <b>.831</b> | -.011                                   | -.011       |
| <b>Qualitative JI 1</b>                             | -.067                                 | -.063       | .000                                  | .000        | .226                                     | .240        | <b>.550</b>                             | <b>.576</b> |
| <b>Qualitative JI 2</b>                             | .018                                  | .017        | .026                                  | .026        | -.069                                    | -.074       | <b>.812</b>                             | <b>.855</b> |
| <b>Qualitative JI 3</b>                             | .025                                  | .023        | -.008                                 | -.008       | .054                                     | .056        | <b>.824</b>                             | <b>.843</b> |
| <b>Reliability (McDonald's <math>\omega</math>)</b> | .916                                  | .935        | .870                                  | .915        | .836                                     | .932        | .800                                    | .838        |

*Note.* Factor loadings on the target factor are reported in bold, and they were all significant for  $p < .001$ .

**Table S2**

*Cross-cultural Measurement Invariance of the Correlated CFA Model of the Criterion Validity Measures.*

|                              | <b>SB<math>\chi^2</math></b> | <b>df</b> | <b>RMSEA (90% C.I.)</b> | <b>CFI</b> | <b>TLI</b> | <b>SRMR</b> | <b>Model Comparison</b> | <b><math>\Delta</math>CFI</b> |
|------------------------------|------------------------------|-----------|-------------------------|------------|------------|-------------|-------------------------|-------------------------------|
| ITA only (n=743)             | 1437.220                     | 637       | .041 (.038 - .044)      | .928       | .921       | .047        |                         |                               |
| U.S. only (n=494)            | 1346.248                     | 637       | .048 (.044 - .051)      | .932       | .926       | .057        |                         |                               |
| 1. Configural                | 2776.851                     | 1274      | .044 (.041 - .046)      | .930       | .920       | .051        | —                       | —                             |
| 2. Metric                    | 2859.937                     | 1304      | .044 (.042 - .046)      | .928       | .922       | .056        | 2 vs. 1                 | .002                          |
| 3. Scalar                    | 3147.889                     | 1334      | .047 (.045 - .049)      | .916       | .911       | .058        | 3 vs. 2                 | .012                          |
| 4. Scalar <sub>partial</sub> | 3020.144                     | 1332      | .045 (.043 - .047)      | .922       | .917       | .057        | 4 vs. 2                 | .006                          |
| 5. Strict                    | 3402.261                     | 1369      | .049 (.047 - .051)      | .905       | .903       | .070        | 5 vs. 4                 | .030                          |
| 6. Strict <sub>partial</sub> | 3219.978                     | 1364      | .047 (.045 - .049)      | .914       | .911       | .062        | 6 vs. 4                 | .008                          |

*Note.* SB $\chi^2$  = Satorra-Bentler chi-square test statistic; *df* = degrees of freedom; RMSEA = Root Mean Square Error of Approximation; CFI = Comparative fit Index; TLI=Tucker-Lewis fit index; SRMR = Standardized Root Mean Square Residual.

**Table S3**

*Standardized Factor Loadings and Reliabilities of the CFA Factors of Criterion Validity Measures Estimated from the Most Restrictive Measurement Invariance Model.*

|             | Job-Related Health Problems |      | Job Affective Well-Being |      | Financial Inadequacy |      | Financial Strain |      | Self-Rated Job performance |      | Positivity |      | Negative emotional Self-Efficacy |      | Task Self-Efficacy |      |
|-------------|-----------------------------|------|--------------------------|------|----------------------|------|------------------|------|----------------------------|------|------------|------|----------------------------------|------|--------------------|------|
|             | ITA                         | U.S. | ITA                      | U.S. | ITA                  | U.S. | ITA              | U.S. | ITA                        | U.S. | ITA        | U.S. | ITA                              | U.S. | ITA                | U.S. |
| JRHP_P1     | .71                         | .75  |                          |      |                      |      |                  |      |                            |      |            |      |                                  |      |                    |      |
| JRHP_P2     | .76                         | .80  |                          |      |                      |      |                  |      |                            |      |            |      |                                  |      |                    |      |
| JRHP_P3     | .74                         | .79  |                          |      |                      |      |                  |      |                            |      |            |      |                                  |      |                    |      |
| JAWS_P1     |                             |      | .86                      | .89  |                      |      |                  |      |                            |      |            |      |                                  |      |                    |      |
| JAWS_P2     |                             |      | .86                      | .89  |                      |      |                  |      |                            |      |            |      |                                  |      |                    |      |
| JAWS_P3     |                             |      | .84                      | .88  |                      |      |                  |      |                            |      |            |      |                                  |      |                    |      |
| FinInad1    |                             |      |                          |      | .48                  | .53  |                  |      |                            |      |            |      |                                  |      |                    |      |
| FinInad2    |                             |      |                          |      | .79                  | .85  |                  |      |                            |      |            |      |                                  |      |                    |      |
| FinInad3    |                             |      |                          |      | .67                  | .74  |                  |      |                            |      |            |      |                                  |      |                    |      |
| FinInad4    |                             |      |                          |      | .85                  | .89  |                  |      |                            |      |            |      |                                  |      |                    |      |
| FinStrain1  |                             |      |                          |      |                      |      | .81              | .82  |                            |      |            |      |                                  |      |                    |      |
| FinStrain3  |                             |      |                          |      |                      |      | .88              | .89  |                            |      |            |      |                                  |      |                    |      |
| FinStrain3  |                             |      |                          |      |                      |      | .89              | .90  |                            |      |            |      |                                  |      |                    |      |
| FinStrain4  |                             |      |                          |      |                      |      | .86              | .87  |                            |      |            |      |                                  |      |                    |      |
| SRJP1       |                             |      |                          |      |                      |      |                  |      | .76                        | .82  |            |      |                                  |      |                    |      |
| SRJP2       |                             |      |                          |      |                      |      |                  |      | .78                        | .89  |            |      |                                  |      |                    |      |
| SRJP3       |                             |      |                          |      |                      |      |                  |      | .86                        | .90  |            |      |                                  |      |                    |      |
| SRJP4       |                             |      |                          |      |                      |      |                  |      | .72                        | .87  |            |      |                                  |      |                    |      |
| Positivity1 |                             |      |                          |      |                      |      |                  |      |                            |      | .57        | .80  |                                  |      |                    |      |
| Positivity2 |                             |      |                          |      |                      |      |                  |      |                            |      | .80        | .85  |                                  |      |                    |      |
| Positivity3 |                             |      |                          |      |                      |      |                  |      |                            |      | .54        | .61  |                                  |      |                    |      |
| Positivity4 |                             |      |                          |      |                      |      |                  |      |                            |      | .74        | .79  |                                  |      |                    |      |
| Positivity5 |                             |      |                          |      |                      |      |                  |      |                            |      | .83        | .87  |                                  |      |                    |      |
| Positivity6 |                             |      |                          |      |                      |      |                  |      |                            |      | .47        | .53  |                                  |      |                    |      |
| Positivity7 |                             |      |                          |      |                      |      |                  |      |                            |      | .72        | .77  |                                  |      |                    |      |
| Positivity8 |                             |      |                          |      |                      |      |                  |      |                            |      | .66        | .83  |                                  |      |                    |      |
| NegEmoSE1   |                             |      |                          |      |                      |      |                  |      |                            |      |            |      | .78                              | .79  |                    |      |
| NegEmoSE2   |                             |      |                          |      |                      |      |                  |      |                            |      |            |      | .81                              | .82  |                    |      |
| NegEmoSE3   |                             |      |                          |      |                      |      |                  |      |                            |      |            |      | .66                              | .67  |                    |      |
| NegEmoSE4   |                             |      |                          |      |                      |      |                  |      |                            |      |            |      | .68                              | .69  |                    |      |
| TaskSE1     |                             |      |                          |      |                      |      |                  |      |                            |      |            |      |                                  |      | .73                | .79  |
| TaskSE2     |                             |      |                          |      |                      |      |                  |      |                            |      |            |      |                                  |      | .71                | .78  |
| TaskSE3     |                             |      |                          |      |                      |      |                  |      |                            |      |            |      |                                  |      | .70                | .76  |
| TaskSE4     |                             |      |                          |      |                      |      |                  |      |                            |      |            |      |                                  |      | .68                | .74  |
| TaskSE5     |                             |      |                          |      |                      |      |                  |      |                            |      |            |      |                                  |      | .69                | .86  |
| TaskSE6     |                             |      |                          |      |                      |      |                  |      |                            |      |            |      |                                  |      | .66                | .72  |
| TaskSE7     |                             |      |                          |      |                      |      |                  |      |                            |      |            |      |                                  |      | .74                | .79  |
| TaskSE8     |                             |      |                          |      |                      |      |                  |      |                            |      |            |      |                                  |      | .73                | .79  |

*Note.* Factor loadings were all significant for  $p < .001$ . For sake of model parsimony, Job-related health problems and job affective well-being items were previously grouped into three parcels based on their corrected item-to-total correlations (Little, 2013).

**Table S4***Latent Zero-Order Correlations and Reliability of the Criterion Validity Measures.*

|                                     | 1.               | 2.               | 3.               | 4.               | 5.               | 6.               | 7.               | 8.               |
|-------------------------------------|------------------|------------------|------------------|------------------|------------------|------------------|------------------|------------------|
| 1. Job-Related Health Problems      | <b>.86 (.89)</b> | -.33***          | .39***           | .29***           | -.04             | -.20***          | -.18**           | -.05             |
| 2. Job Affective Well-Being         | -.27***          | <b>.89 (.86)</b> | -.43***          | -.52***          | .24***           | .63***           | .53***           | .43***           |
| 3. Financial Inadequacy             | .21***           | -.26***          | <b>.79 (.85)</b> | .85***           | -.22***          | -.42***          | -.31***          | -.24***          |
| 4. Financial Strain                 | .25***           | -.37***          | .77***           | <b>.92 (.92)</b> | -.05             | -.49***          | -.27***          | -.13*            |
| 5. Self-Rated Job Performance       | -.09             | .13**            | -.25***          | -.08             | <b>.86 (.92)</b> | .31***           | .53***           | .78***           |
| 6. Positivity                       | -.27***          | .50***           | -.38***          | -.39***          | .30***           | <b>.84 (.92)</b> | .54***           | .49***           |
| 7. Negative Emotional Self-Efficacy | -.16**           | .41***           | -.08             | -.12*            | .17***           | .31***           | <b>.82 (.83)</b> | .81***           |
| 8. Task Self-Efficacy               | -.13**           | .30***           | -.09*            | -.04             | .51***           | .35***           | .53***           | <b>.89 (.92)</b> |

*Note.* Correlations below the diagonal pertain to the ITA sample, while those above to the U.S. sample. Reliability coefficients (McDonald's  $\omega$ ) are reported along the diagonal (ITA sample out of brackets, U.S. sample within brackets and italicized). \* $p < .05$ , \*\* $p < .01$ , \*\*\* $p < .001$
